# Supplementary material
Source: PubMed Central journal article supplement (PMC5762166)
Supplement: cs7b03198_si_001.pdf [file cs7b03198_si_001.pdf]

## Supporting Information

### Amorphous Cobalt Vanadium Oxide as a Highly Active Electrocatalyst for Oxygen Evolution

Laurent Liardet and Xile Hu\*

Laboratory of Inorganic Synthesis and Catalysis, Institute of Chemical Sciences and Engineering, Ecole Polytechnique Fédérale de Lausanne (EPFL), 1015 Lausanne, Switzerland.

Corresponding Author: [\\*xile.hu@epfl.ch](mailto:*xile.hu@epfl.ch)

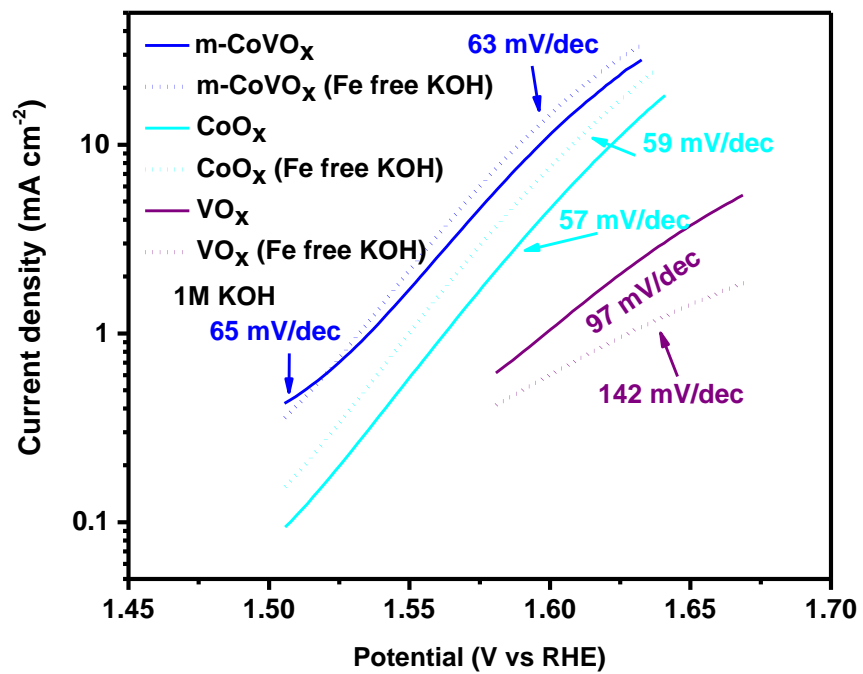

**Figure S1.** Tafel slopes of *m-CoVO<sub>x</sub>*, *CoO<sub>x</sub>* and *VO<sub>x</sub>* in 1 M KOH and 1 M Fe-free KOH.

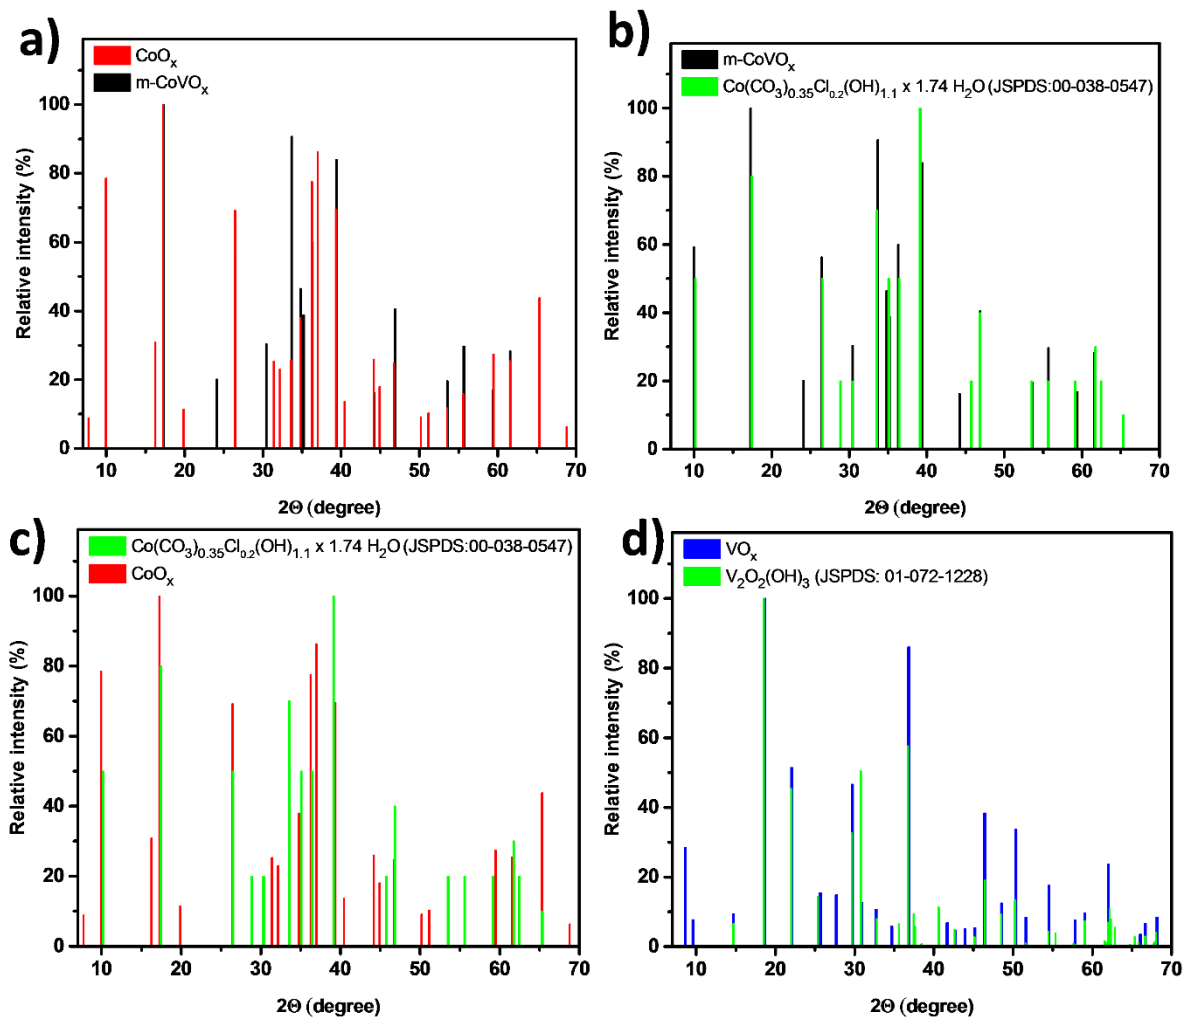

**Figure S2.** a) Comparison of extracted XRD peaks for  $m\text{-CoVO}_x$  and  $\text{CoO}_x$ . b) Comparison of extracted XRD peaks for  $m\text{-CoVO}_x$  and  $\text{Co}(\text{CO}_3)_{0.35}\text{Cl}_{0.2}(\text{OH})_{1.1} \cdot 1.74 \text{H}_2\text{O}$ . c) Comparison of extracted XRD peaks for  $\text{CoO}_x$  and  $\text{Co}(\text{CO}_3)_{0.35}\text{Cl}_{0.2}(\text{OH})_{1.1} \cdot 1.74 \text{H}_2\text{O}$ . d) Comparison of extracted XRD peaks for  $\text{VO}_x$  and  $\text{V}_2\text{O}_2(\text{OH})_3$ .

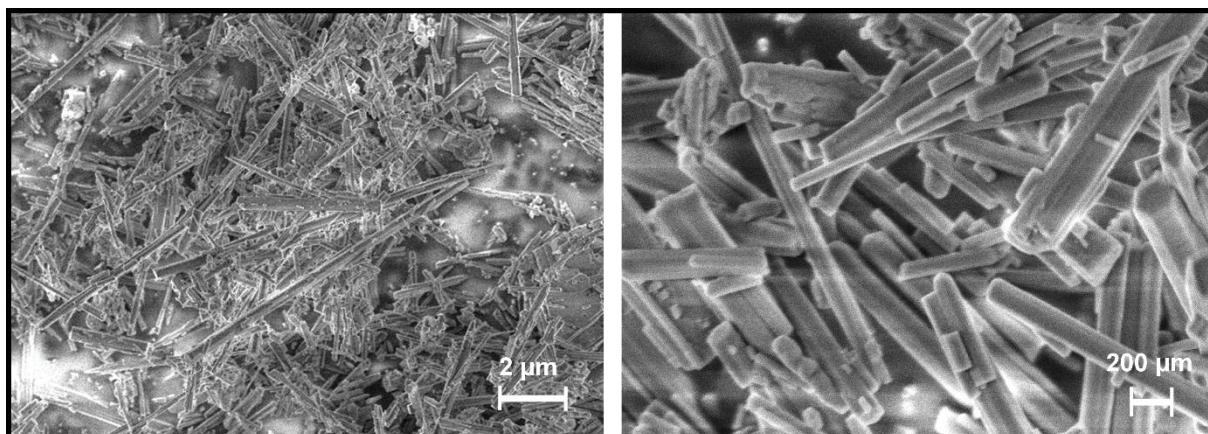

**Figure S3.** SEM images of CoO<sub>x</sub>.

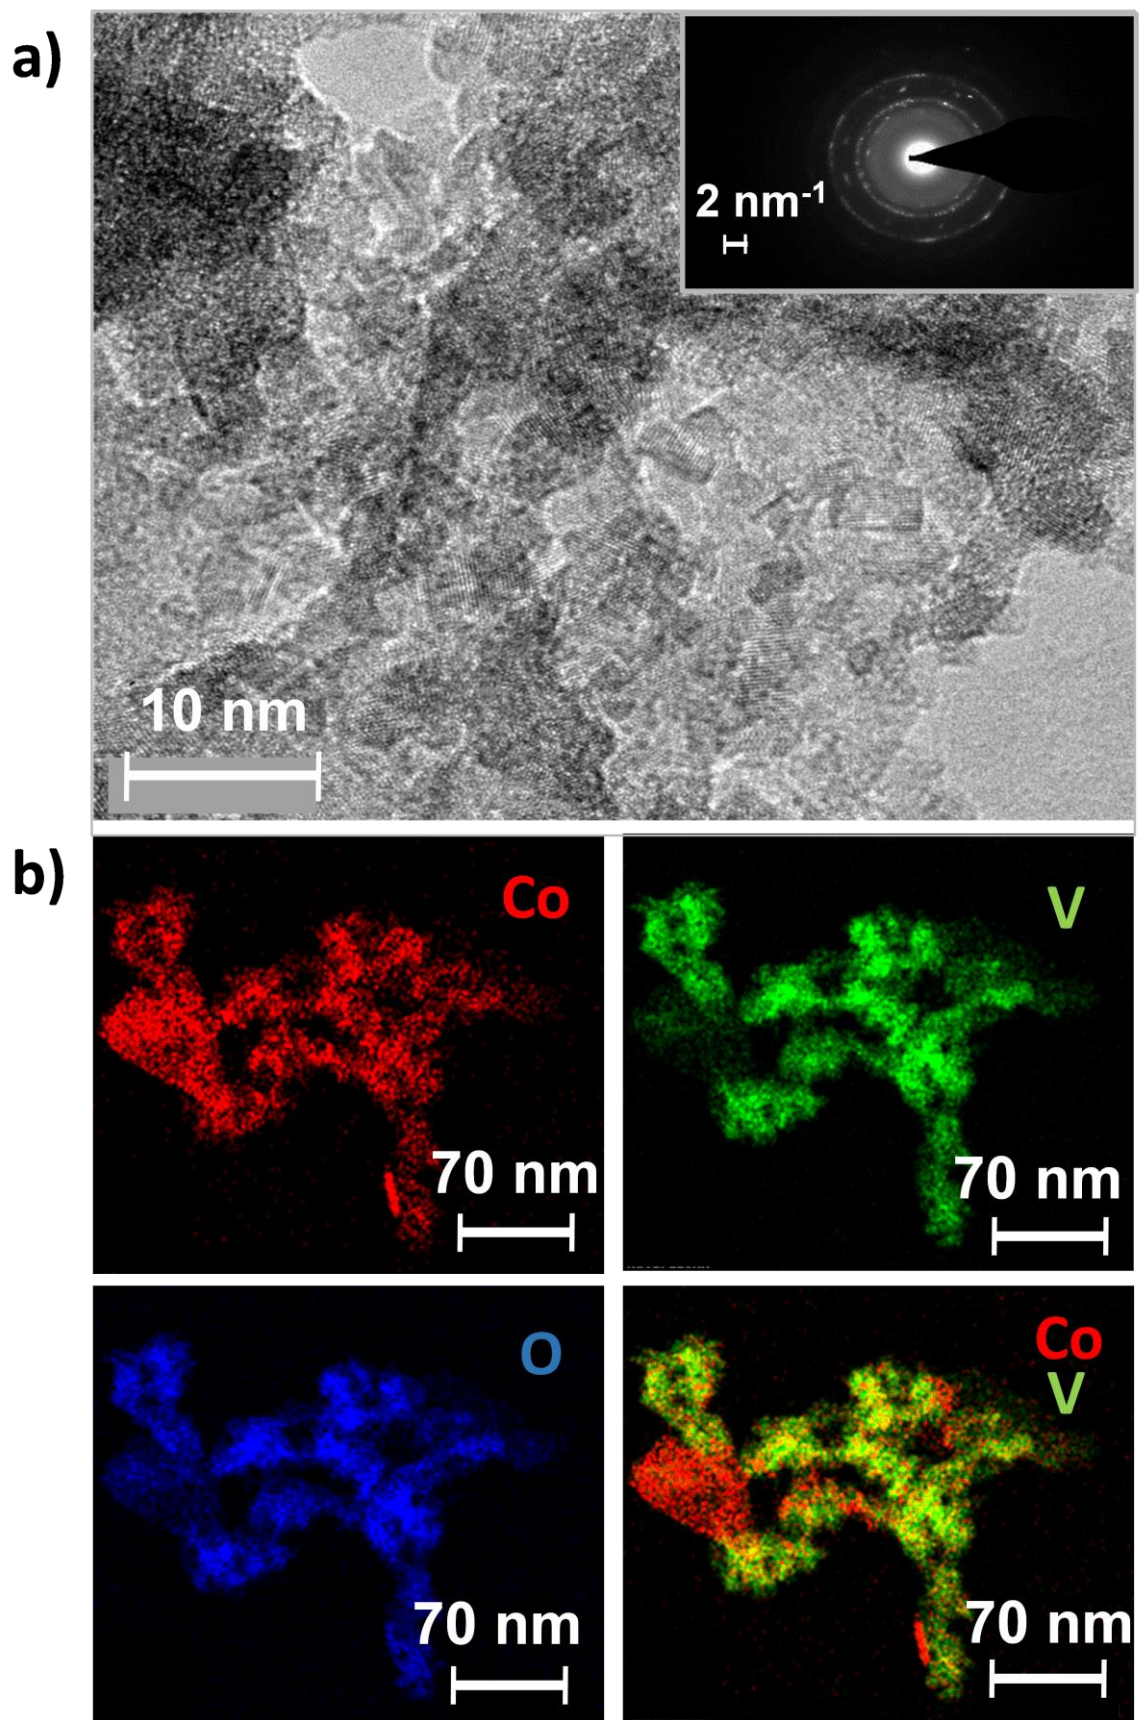

**Figure S4.** a) TEM image of  $m\text{-CoVO}_x$ . b) STEM-EDX mapping of  $m\text{-CoVO}_x$ .

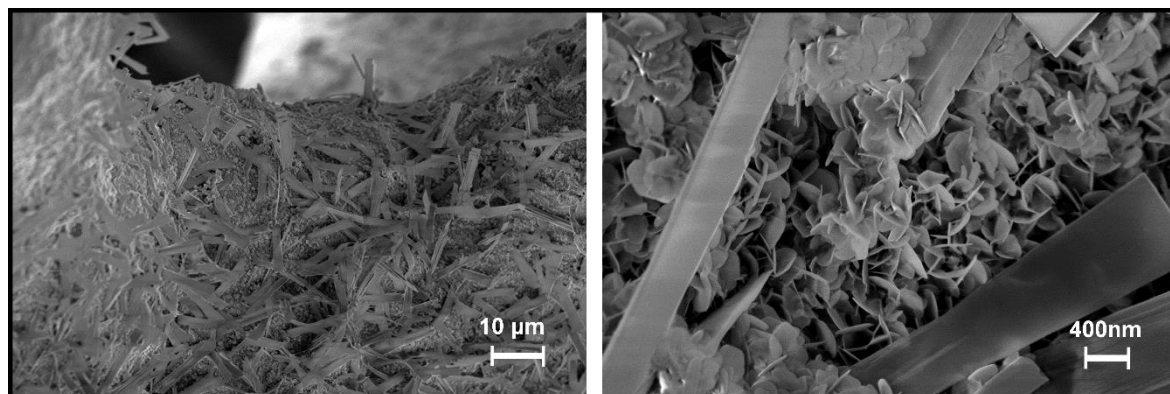

**Figure S5.** SEM images of  $m\text{-CoVO}_x$  on nickel foam.

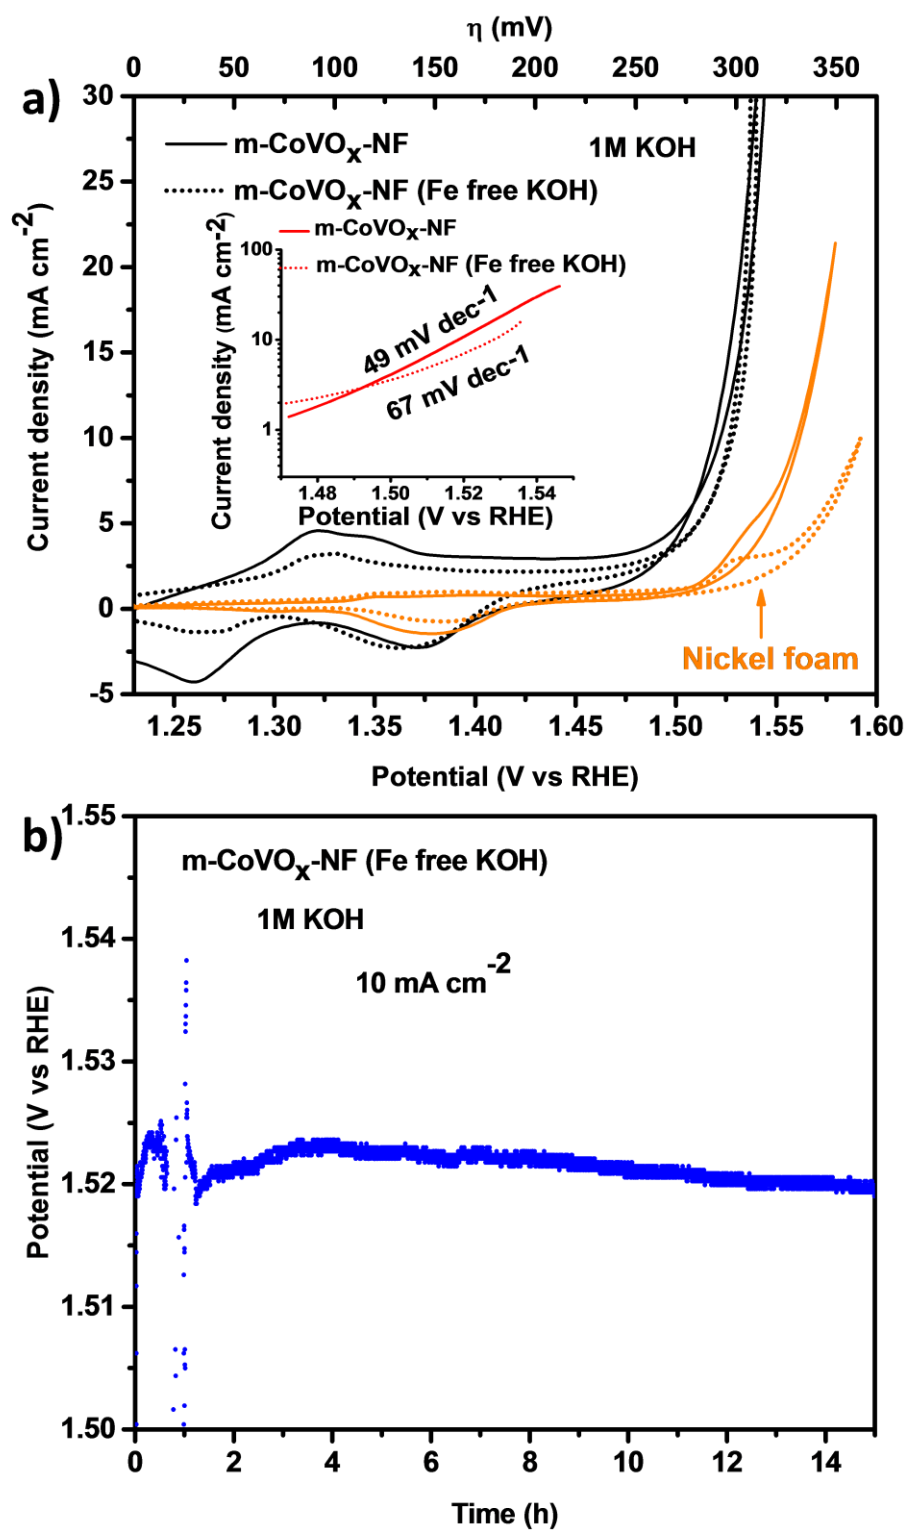

**Figure S6.** a) Polarization curves for  $m\text{-CoVO}_x$  on nickel foam and extracted tafel slopes in 1 M KOH. Scan rate  $1 \text{ mV s}^{-1}$ ;  $iR$  drop corrected. b) Stability of  $m\text{-CoVO}_x$  on nickel foam at  $10 \text{ mA cm}^{-2}$  in 1 M Fe-free KOH.

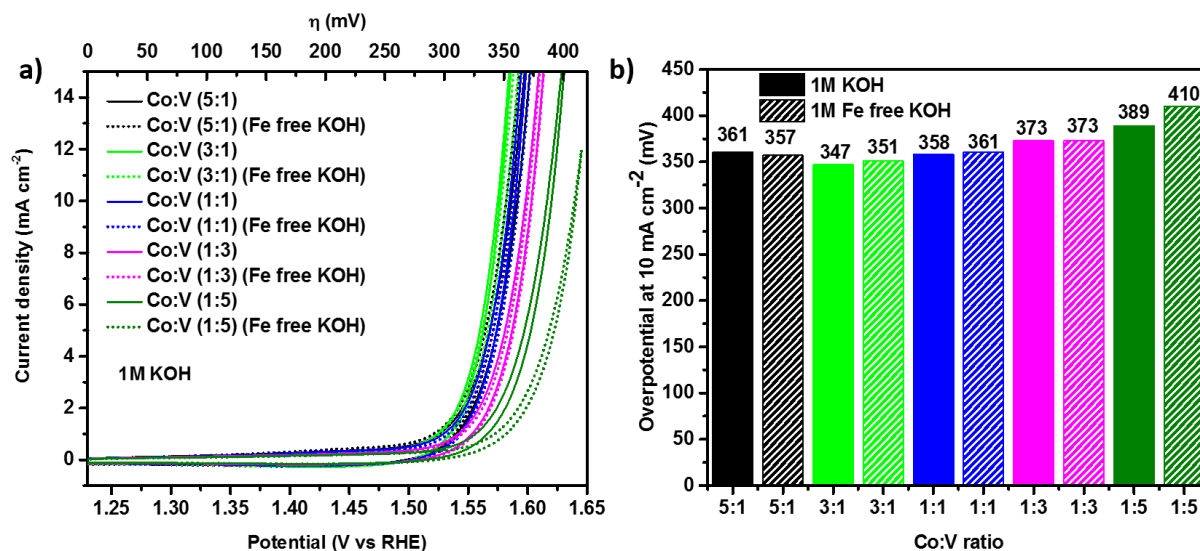

**Figure S7.** a) Polarization curves on glassy carbon of cobalt vanadium oxides synthesized with different Co:V ratio in the hydrothermal solution in 1 M KOH and 1 M Fe-free KOH. Scan rate 10 mV s<sup>-1</sup>; iR drop corrected. b) Overpotentials for the different cobalt vanadium oxides with different Co:V ratios in 1 M KOH and 1 M Fe-free KOH at 10 mA cm<sup>-2</sup>.

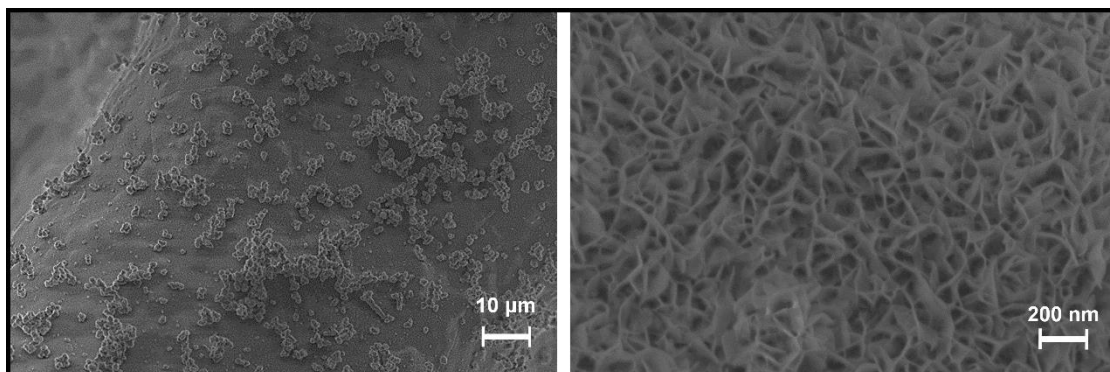

**Figure S8.** SEM images of *a*-CoVO<sub>x</sub> on nickel foam.



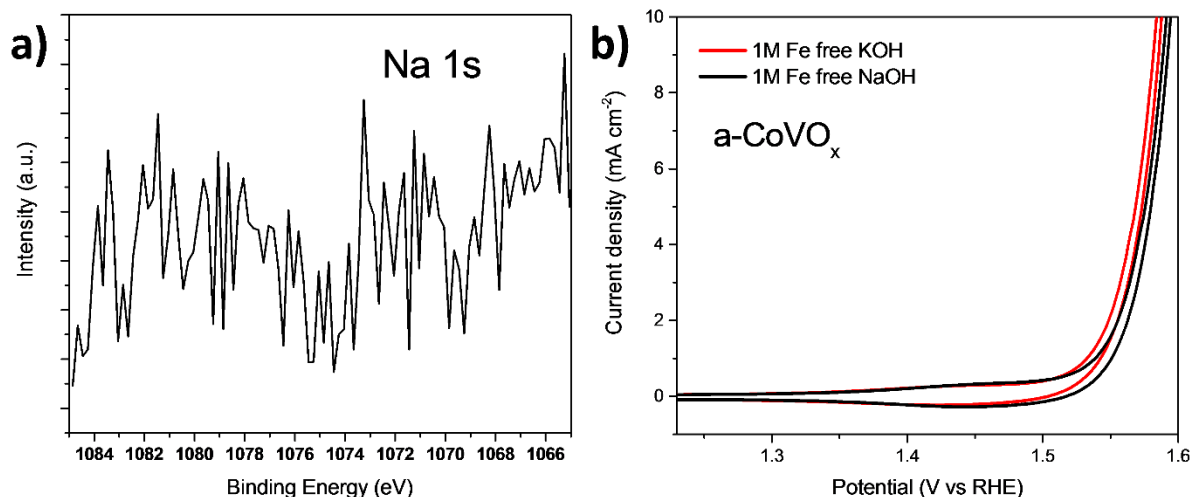

**Figure S9.** a) High resolution region spectra of Na 1s of XPS spectra of  $a\text{-CoVO}_x$ . b) Polarization curves on glassy carbon (loading  $140 \mu\text{g cm}^{-2}$ ) of  $a\text{-CoVO}_x$  in 1 M Fe-free KOH and 1 M Fe-free NaOH. Scan rate  $10 \text{ mV s}^{-1}$ ; iR drop corrected.

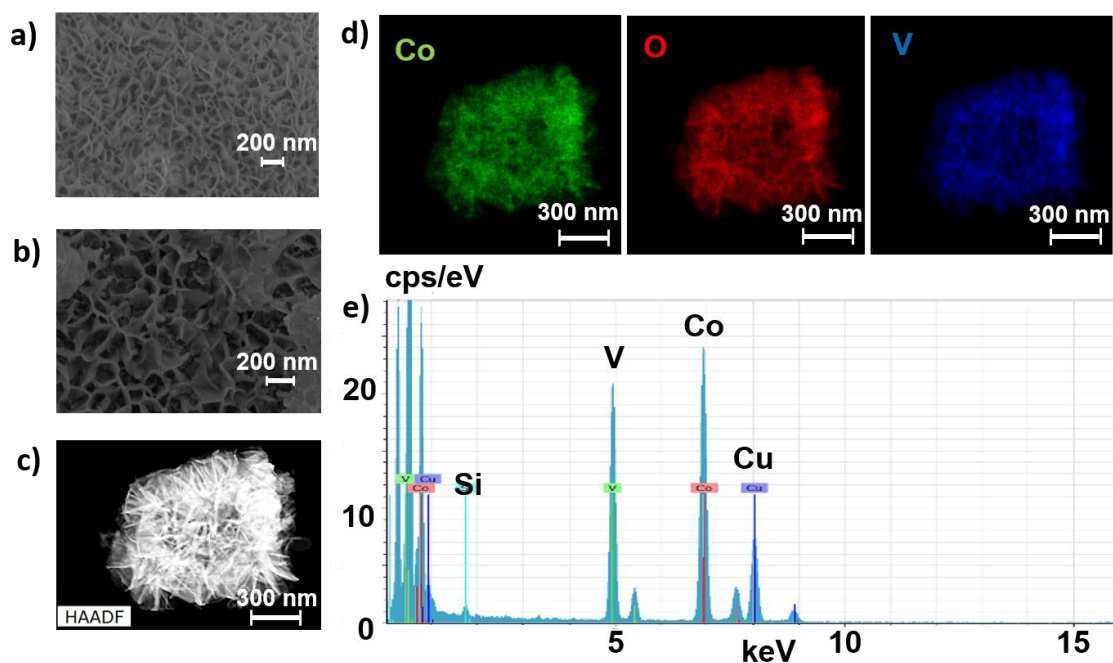

**Figure S10.** a) SEM image of  $a\text{-CoVO}_x$  on nickel foam before electrolysis. b) SEM image of  $a\text{-CoVO}_x$  on nickel foam after 15 h of electrolysis at  $10 \text{ mA cm}^{-2}$  in 1 M Fe-free KOH. c) STEM image of  $a\text{-CoVO}_x$  initially deposited on nickel foam. d) STEM-EDX mapping of  $a\text{-CoVO}_x$  initially deposited on nickel foam after 15 h of electrolysis at  $10 \text{ mA cm}^{-2}$  in 1 M Fe-free KOH. e) EDX spectrum of  $a\text{-CoVO}_x$  initially deposited on nickel foam after 15 h of electrolysis at  $10 \text{ mA cm}^{-2}$  in 1 M Fe-free KOH.

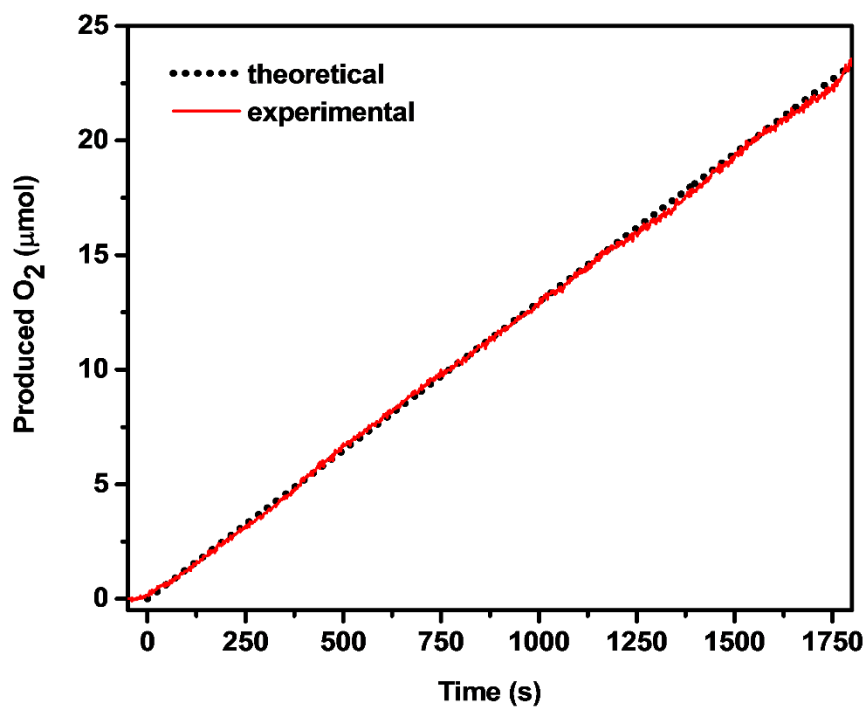

**Figure S11.** Agreement between measured and predicted moles of  $O_2$  produced by  $a-CoVO_x$  on nickel foam indicates nearly 100% faradaic efficiency.  $a-Co$

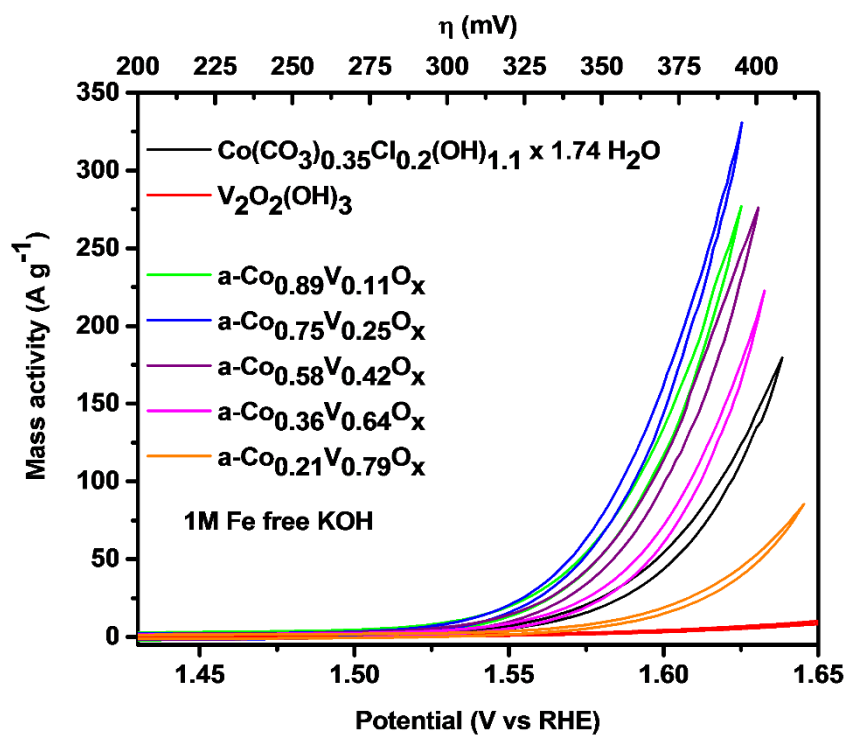

**Figure S12.** Mass activity of different  $a-Co_yV_{1-y}O_x$  on glassy carbon (loading  $140 \mu g cm^{-2}$ ).

Scan rate  $10 mV s^{-1}$ ;  $iR$  drop corrected.

**Table S1.** Comparison between the Co:V concentration ratios in the deposition solution and the Co:V ratios in the final catalysts determined by XPS.

| Catalyst                                              | Deposition bath CoCl <sub>2</sub> :VCl <sub>3</sub> ratio | XPS Co:V ratio (atomic %) |
|-------------------------------------------------------|-----------------------------------------------------------|---------------------------|
| <b>Co<sub>0.89</sub>V<sub>0.11</sub>O<sub>x</sub></b> | 5:1                                                       | Co: 89%, V: 11% (9:1)     |
| <b>Co<sub>0.75</sub>V<sub>0.25</sub>O<sub>x</sub></b> | 3:1                                                       | Co: 75%, V: 25% (3:1)     |
| <b>Co<sub>0.58</sub>V<sub>0.42</sub>O<sub>x</sub></b> | 1:1                                                       | Co: 58%, V: 42% (3:2)     |
| <b>Co<sub>0.36</sub>V<sub>0.64</sub>O<sub>x</sub></b> | 1:3                                                       | Co: 36%, V: 64% (2:3)     |
| <b>Co<sub>0.21</sub>V<sub>0.79</sub>O<sub>x</sub></b> | 1:5                                                       | Co: 21%, V: 79% (1:4)     |

**Table S2.** Bond strength of the different Co<sub>y</sub>V<sub>1-y</sub>O<sub>x</sub> for physical mixtures calculated using the method proposed by Bockris and Otagawa.<sup>1</sup>

| Mixture of metal hydroxides   | M-OH bond strength (kcal mol <sup>-1</sup> ) |
|-------------------------------|----------------------------------------------|
| <b>Co-OH</b>                  | 130.4                                        |
| <b>0.89 Co-OH + 0.11 V-OH</b> | 136.8                                        |
| <b>0.75 Co-OH + 0.25 V-OH</b> | 144.9                                        |
| <b>0.58 Co-OH + 0.42 V-OH</b> | 154.8                                        |
| <b>0.36Co-OH + 0.64 V-OH</b>  | 167.6                                        |
| <b>0.21 Co-OH + 0.79 V-OH</b> | 176.3                                        |
| <b>V-OH</b>                   | 188.5                                        |

**Table S3.** Summary of the mass activities of the different oxides in 1 M KOH at η = 350 mV.

| Metal oxide                                                                                                        | Mass activity (A g <sup>-1</sup> at η = 350 mV) |
|--------------------------------------------------------------------------------------------------------------------|-------------------------------------------------|
| <b>CoO<sub>x</sub> (Co(CO<sub>3</sub>)<sub>0.35</sub>Cl<sub>0.2</sub>(OH)<sub>1.1</sub> · 1.74 H<sub>2</sub>O)</b> | 19.2                                            |
| <b>Co<sub>0.89</sub>V<sub>0.11</sub>O<sub>x</sub></b>                                                              | 56.3                                            |
| <b>Co<sub>0.75</sub>V<sub>0.25</sub>O<sub>x</sub></b>                                                              | 69.5                                            |
| <b>Co<sub>0.58</sub>V<sub>0.42</sub>O<sub>x</sub></b>                                                              | 45.6                                            |
| <b>Co<sub>0.36</sub>V<sub>0.64</sub>O<sub>x</sub></b>                                                              | 25.4                                            |
| <b>Co<sub>0.21</sub>V<sub>0.79</sub>O<sub>x</sub></b>                                                              | 6.8                                             |
| <b>VO<sub>x</sub> (V<sub>2</sub>O<sub>2</sub>(OH)<sub>3</sub>)</b>                                                 | 2.1                                             |

## Reference

- (1) Bockris, J. O. M.; Otagawa, T. *J. Electrochem. Soc.* **1984**, 131, 290-302.
